# Supplementary material
Source: publisher site journal article supplement (https://www.spandidos-publications.com/4983/downloadSupplementary)
Supplement: Supplementary file 1 [file downloadSupplementary]

Figure S1. Canonical pathway analysis for the target-mRNAs. The negative logarithmic P-value is presented. The darker purple color tones correspond to comparably more significant regulation. However, the direction of regulation cannot be deduced from it. The asterisk (\*) symbol indicates pathways that were not considered relevant for colorectal cancer due to their sole function in the neuronal system. TIVA, total intravenous anesthesia; VAG, volatile anesthetic gas.

| Canonical pathways                                        | -Log (p-value) |     | Regulatory protein |              |
|-----------------------------------------------------------|----------------|-----|--------------------|--------------|
|                                                           | TIVA           | VAG | TIVA               | VAG          |
| p53_signaling                                             | 0.3            | 2.8 | HIPK2              | BCL2         |
| Autophagy                                                 |                |     | -                  | BCL2         |
| 4-Aminobutyrate degradation I*                            |                |     | -                  | ALDH5A1      |
| Cell cycle: G2/M DNA damage checkpoint regulation         | 0.3            |     | HIPK2              | -            |
| Glutamate degradation III (via 4-aminobutyrate)*          |                |     | -                  | ALDH5A1      |
| Molecular mechanisms of cancer                            | 0.3            |     | HIPK2              | -            |
| Inflammasome pathway                                      |                |     | -                  | P2RX7 (P2X7) |
| Senescence pathway                                        | 0.3            |     | HIPK2              | -            |
| Cytotoxic T lymphocyte-mediated apoptosis of target cells |                |     | -                  | BCL2         |
| B cell development                                        |                |     | -                  | SPN (CD43)   |
| Interferon signaling                                      |                |     | -                  | BCL2         |
| Neuroinflammation signaling pathway*                      |                |     | -                  | BCL2         |
| Docosahexaenoic acid (DHA) signaling                      |                |     | -                  | BCL2         |
| Myc mediated apoptosis signaling                          |                |     | -                  | BCL2         |
